# Supplementary material for: Monitoring the age-specificity of measles transmissions during 2009-2016 in Southern China
Source: PubMed Central journal article supplement (PMC6175510; doi:10.1371/journal.pone.0205339), 2018-10-08

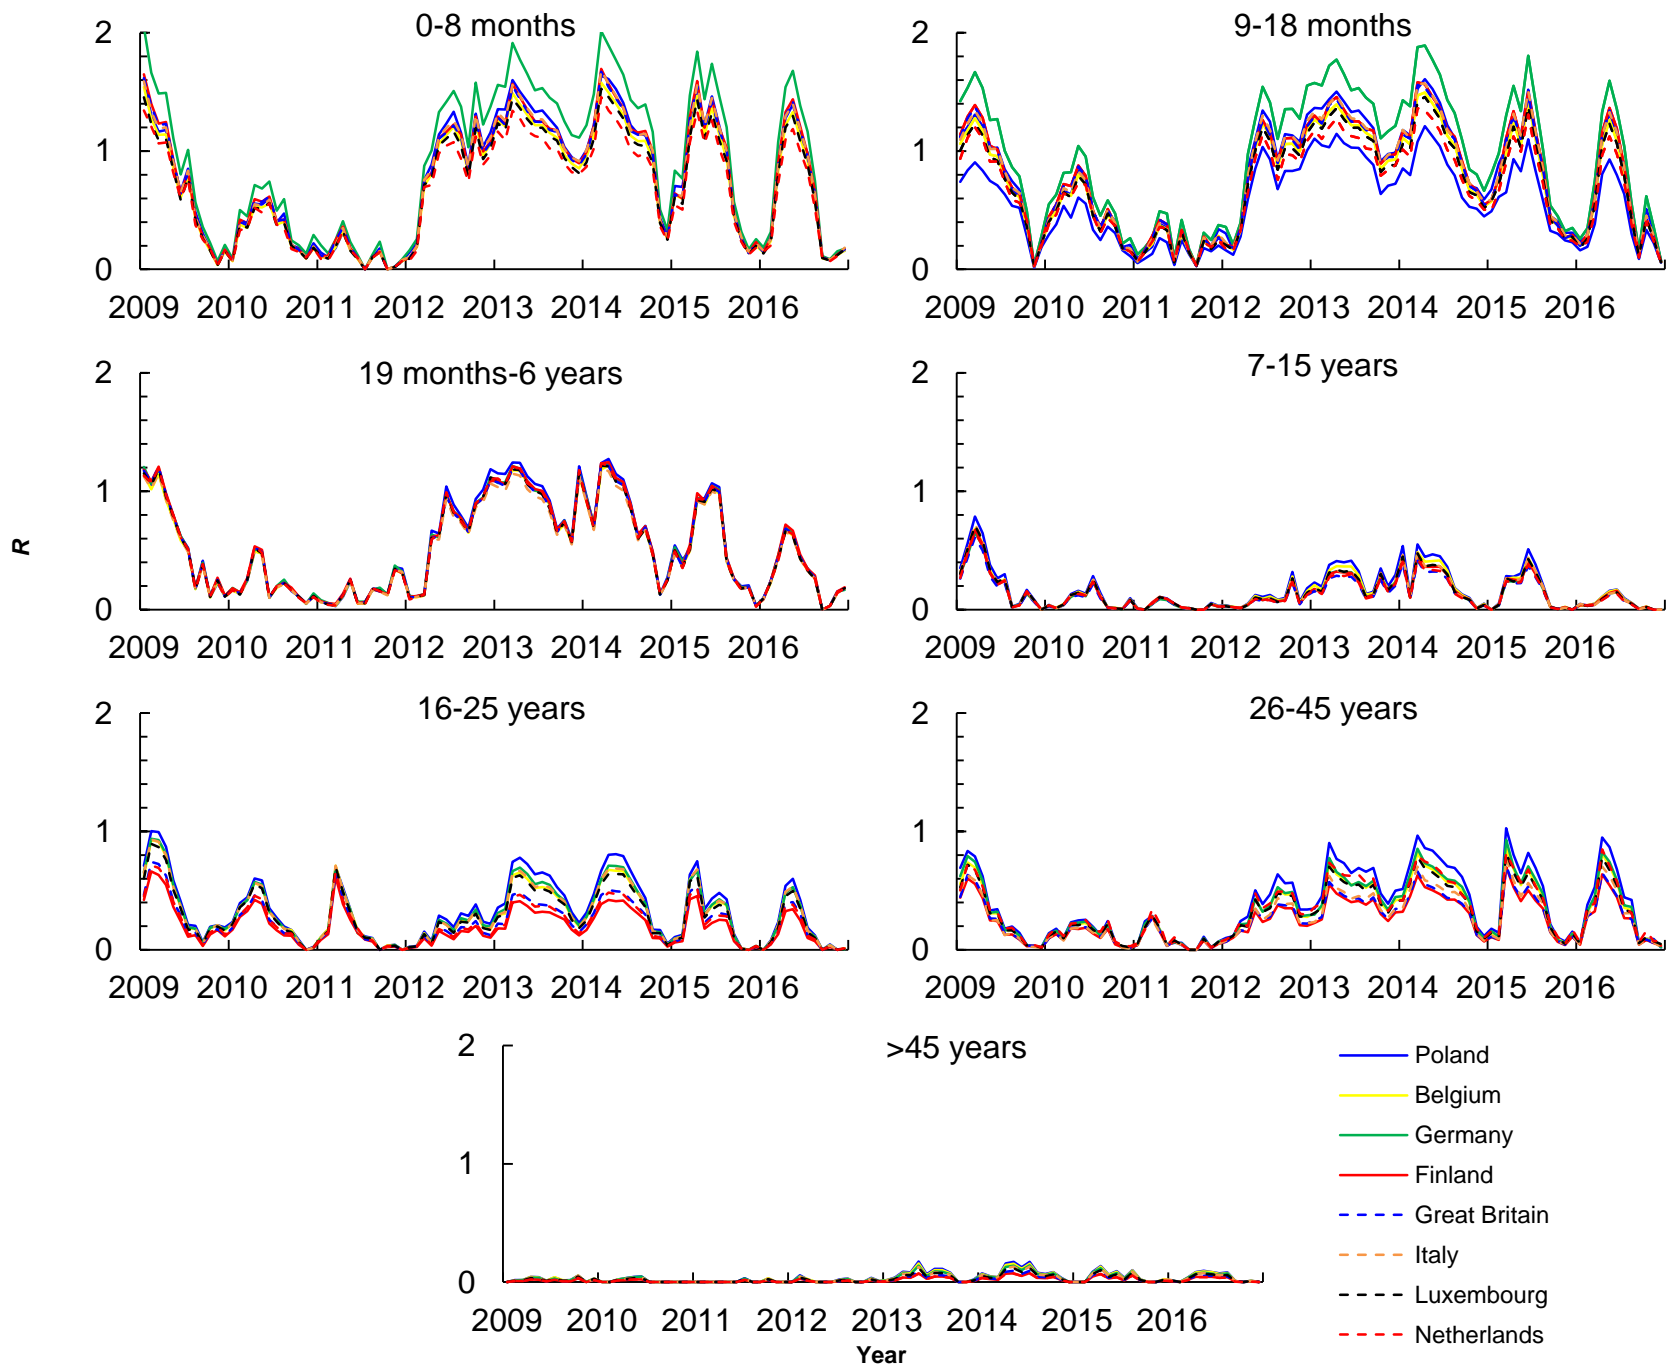

Supplement: pone.0205339.s001.pdf [file pone.0205339.s001.pdf]
