# Supplementary material for: Monitoring the age-specificity of measles transmissions during 2009-2016 in Southern China
Source: PubMed Central journal article supplement (PMC6175510; doi:10.1371/journal.pone.0205339), 2018-10-08
Supplement: pone.0205339.s002.pdf [file pone.0205339.s002.pdf]

## Entire population

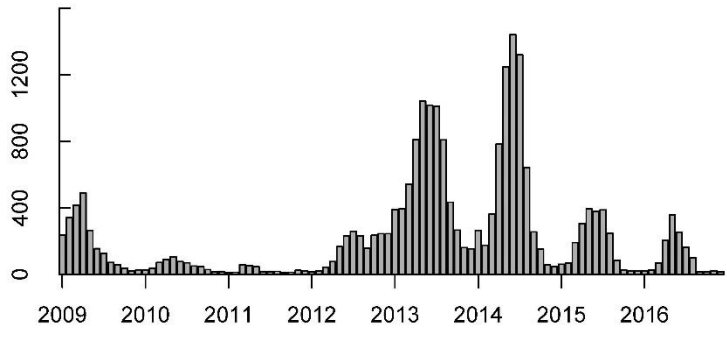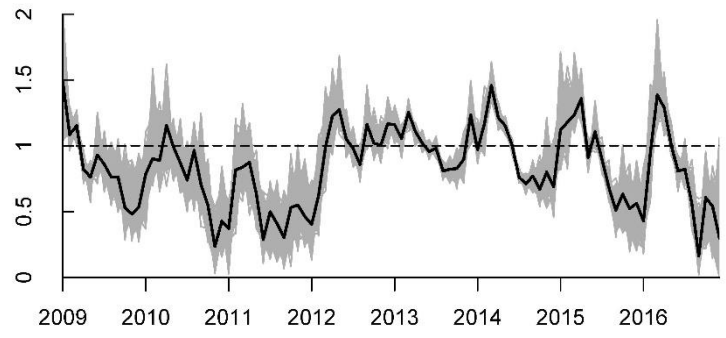

## 0-8 months

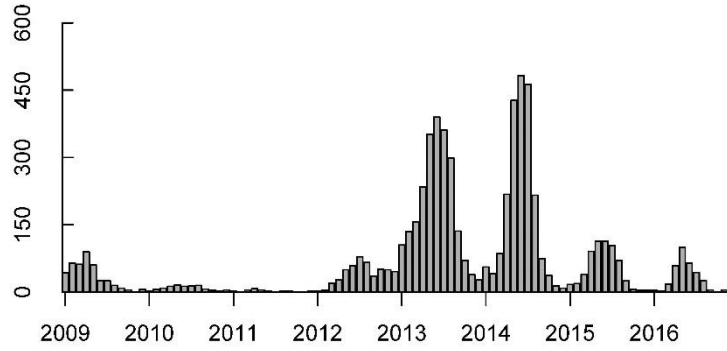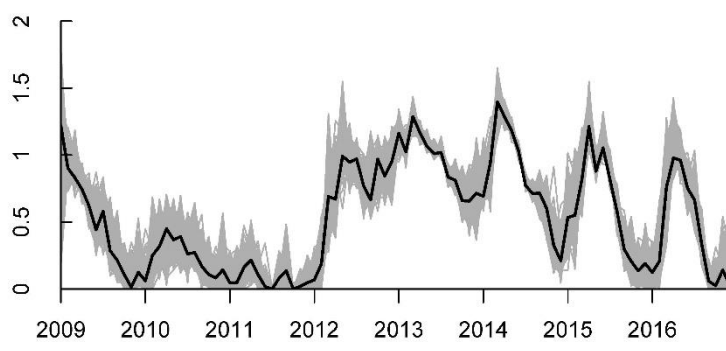

## 9-18 months

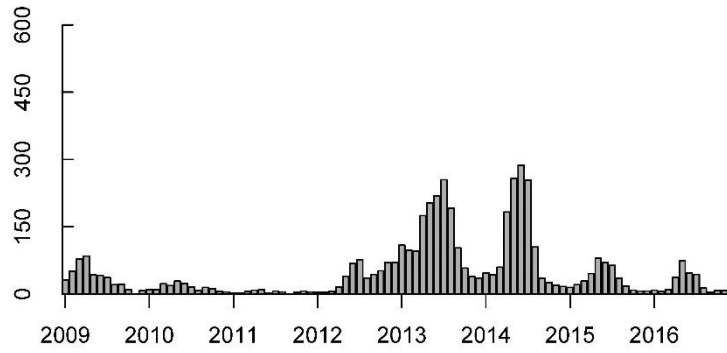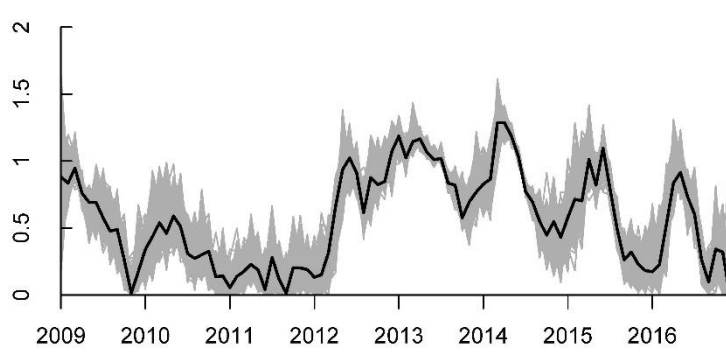

## 19 Months-6 years

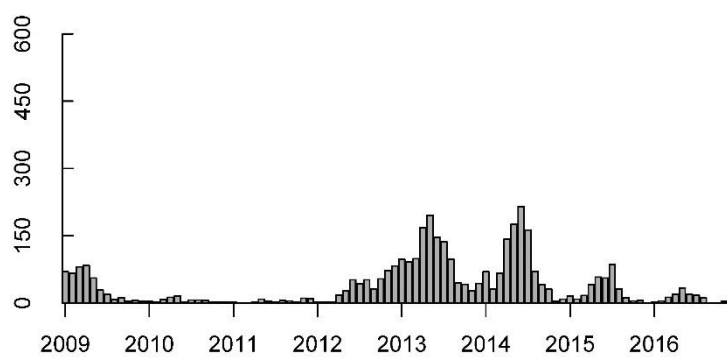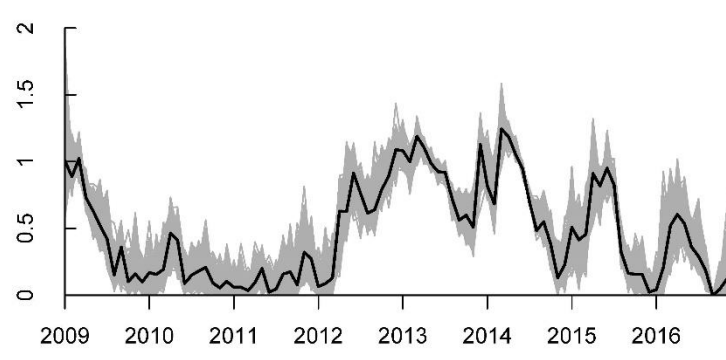

## 7-15 years

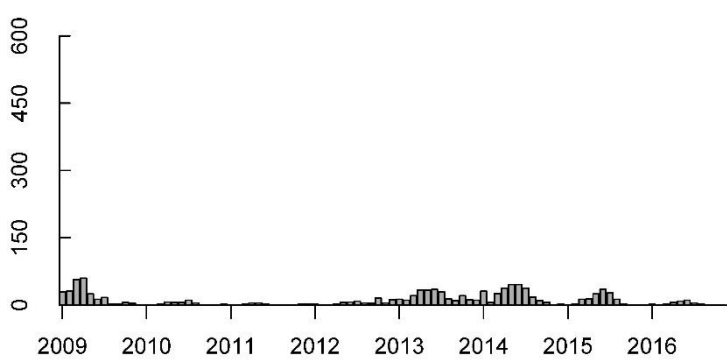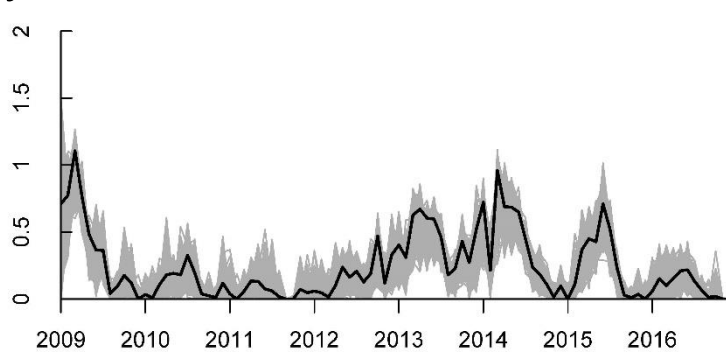

## 16-25 years

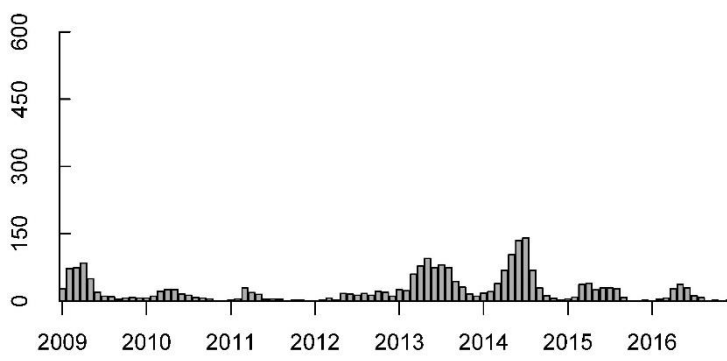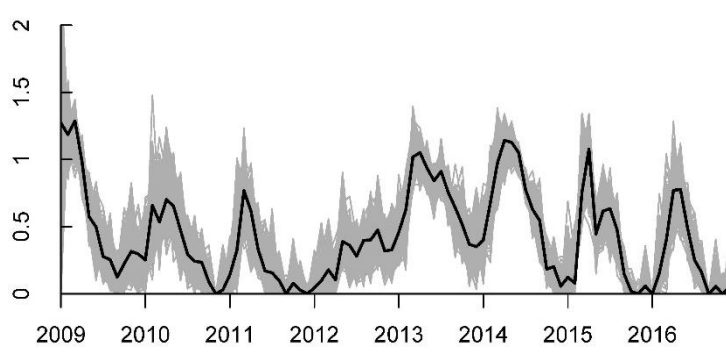

## 26-45 years

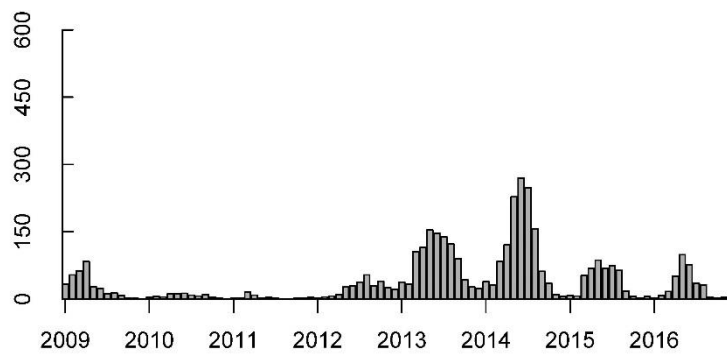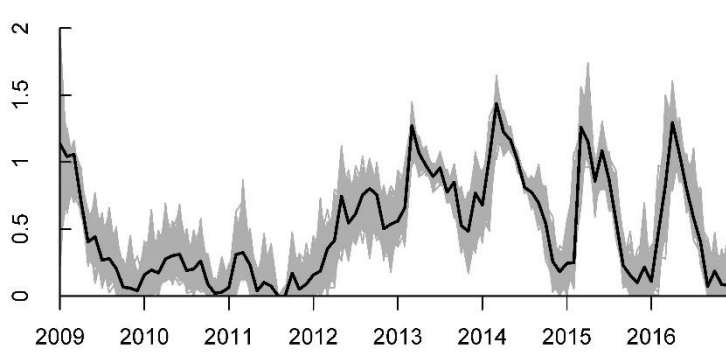

## >45 years

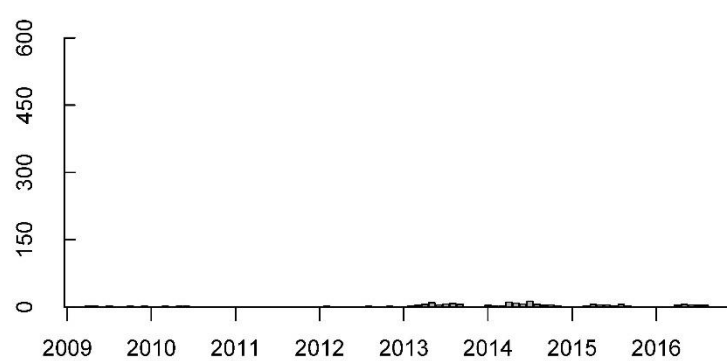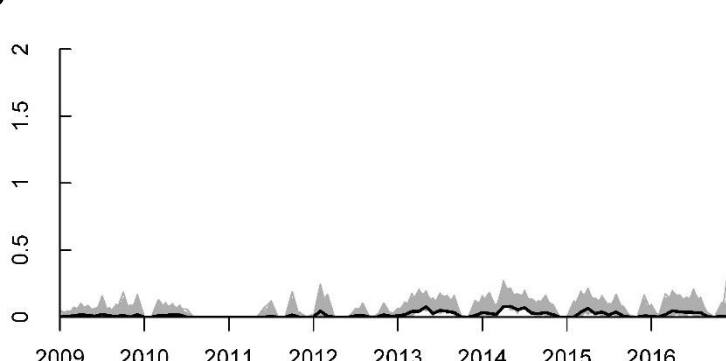

Number of confirmed cases
